# Supplementary material for: A coaxial yarn electrode based on hierarchical MoS2 nanosheets/carbon fiber tows for flexible solid-state supercapacitors
Source: Royal Society of Chemistry journal article supplement (doi:10.1039/c6ra10178j), 2016-01-01
Supplement: c6ra10178j1.pdf [file c6ra10178j1.pdf]

## Supporting Information

### Coaxial Yarn Electrode Based on Hierarchical MoS<sub>2</sub> Nanosheets/Carbon Fiber Tows for Flexible Solid-State Supercapacitors

Lili Gao<sup>\*a</sup>, Xuelian Li<sup>a</sup>, Xiaodong Li<sup>b</sup>, Jianli Cheng<sup>b</sup>, Bin Wang<sup>b</sup>, Zhiyu Wang<sup>a</sup>, Changming Li<sup>c</sup>

<sup>a</sup> College of Environmental Science & Engineering, Taiyuan University of Technology, Taiyuan 030024, Shanxi, Peoples R China

<sup>b</sup> Institute of Chemical Materials, China Academy of Engineering Physics, Mianyang 621900, Sichuan, Peoples R China

<sup>c</sup> Institute of Clean Energy & Advance Material, Southwest University, Chongqing 400715, Peoples R China

#### Synthesis of MoS<sub>2</sub> NSs

Typically, (NH<sub>4</sub>)<sub>6</sub>Mo<sub>7</sub>O<sub>24</sub>·4H<sub>2</sub>O (0.14 mmol) and CH<sub>4</sub>N<sub>2</sub>S (2.00 mmol) were respectively dissolved in deionized water under vigorous stirring to form a homogeneous solution. The reaction was conducted at 200 °C for 9 h in an electric oven. After reaction, the samples were cooled to room temperature naturally, washed several times with deionized water and absolute ethanol, and then dried at 80 °C for 6 h under vacuum.

#### Supporting Figures and some illustrations

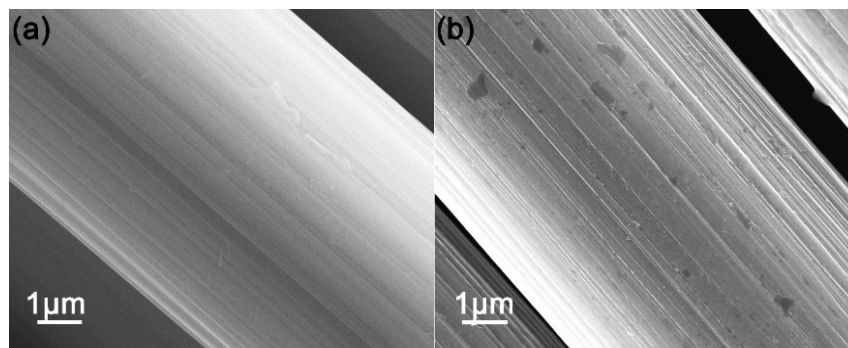

**Figure S1.** SEM images of a single CF (a) and ACF (b).

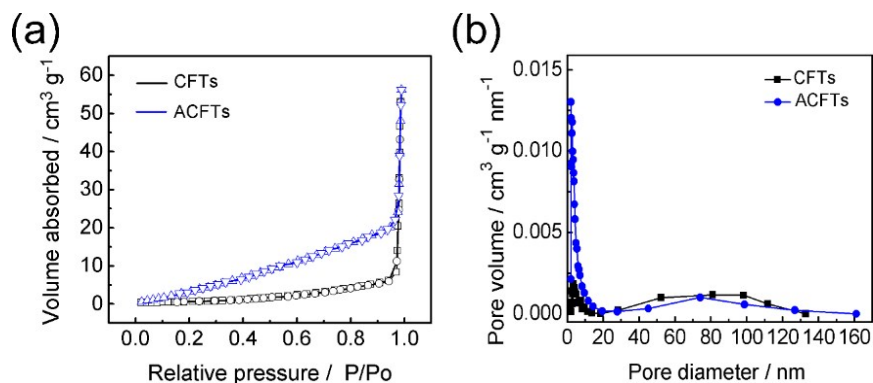

**Figure S2.** Nitrogen adsorption/desorption isotherms (a) and pore-size distribution (b) of CFTs and ACFTs.

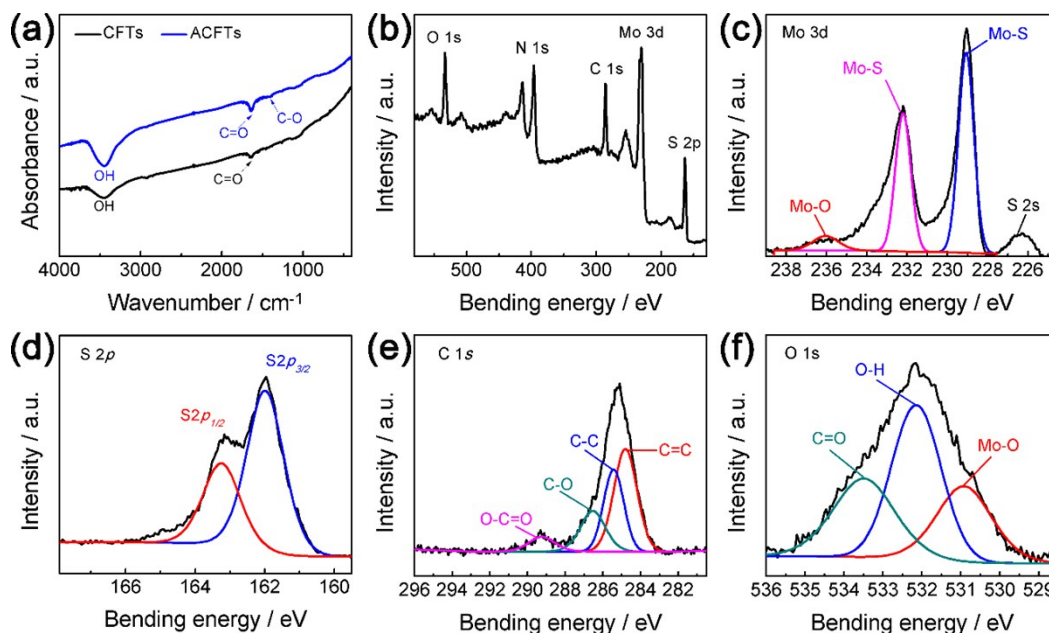

**Figure S3.** (a) The FTIR spectra of CFTs and ACFTs; (b) Low resolution XPS spectrum of ACFTs/MoS<sub>2</sub>; High resolution XPS spectrum of Mo 3d (c), S 2p (d), C 1s (e) and O 1s (f) of ACFTs/MoS<sub>2</sub>.

### (1) Illustration for XPS spectra in figures S3b-S3f

The oxidation state and chemical composition of the ACFTs/MoS<sub>2</sub> were analyzed by XPS. Wide scan XPS spectra of ACFTs/MoS<sub>2</sub> is shown in Figure S3b. Carbon (C), nitrogen (N), sulfur (S) and molybdenum (Mo) peaks can be observed, in which N element may come from nitrogen-contained precursor in the solution of ((NH<sub>4</sub>)<sub>2</sub>S<sub>2</sub>O<sub>8</sub>).<sup>1</sup> As seen in Figure S3c, there are two characteristic peaks at 229.1 and 232.2 eV, which correspond to the Mo 3d<sub>5/2</sub> and Mo 3d<sub>3/2</sub> orbitals, respectively, suggesting a Mo (IV) characteristic in MoS<sub>2</sub>. The peak at 236.1 eV related to the Mo 3d<sub>5/2</sub> corresponding to Mo (VI) is in agreement with typical Mo-O bonds,<sup>2</sup> while the

peak at 226.0 eV can be indexed as S2s. The binding energies located at 162.0 and 163.3 eV are due to S 2p<sub>3/2</sub> and 2p<sub>1/2</sub> of MoS<sub>2</sub>, respectively (Figure S3d). Above binding energy are all in good agreement with values of MoS<sub>2</sub> crystal reported previously.<sup>3</sup> The C1s XPS profile of the ACFTs/MoS<sub>2</sub> (Figure S3e) showed two main strong peaks, corresponding to the sp<sup>2</sup> C=C and C-C bonds at 284.8 and 286.5 eV. In general, the C1s spectrum of ACFTs showed another two peaks centered at 286.5 and 289.2 eV, which correspond to the binding energy of C-O bonds and O-C=O bonds, respectively.<sup>4-7</sup> Therefore, the C1s spectrum of the ACFTs/MoS<sub>2</sub> indicates the oxidation of ACFTs (with oxygen containing functionalized groups). Figure S3f shows the narrow XPS spectrum of O 1s, in which three peaks can be found in the case of ACFTs/MoS<sub>2</sub>, with one peak around 531.0 eV relating to the Mo-O bonds and another two peaks around 532.2 and 533.5 eV corresponding to O-H bonds and C=O bonds, respectively. The O 1s peak around 531.0 eV cannot be associated with MoO<sub>3</sub> phase whose peak is expected at 530.6 eV.<sup>8</sup> The O-H bonds and C=O bonds found in spectrum of O 1s further confirm that the acid treatment can introduce oxygen-containing groups on the surface of CFT. Meanwhile, the weak Mo-O bonds (531.0 eV) and Mo-O bonds (236.1 eV) seen in XPS spectrum of Mo 3d both indicate that the existence of oxygen element plays a critical role in connecting MoS<sub>2</sub> and carbon fiber through Mo-O-C chemical bond.

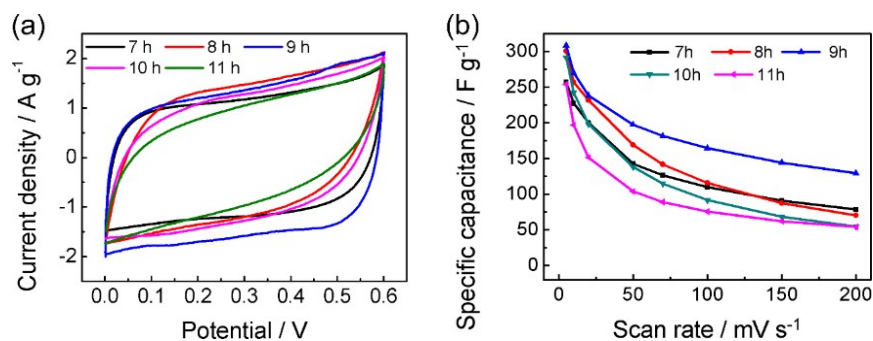

**Figure S4.** CV performance (a) and plots of specific capacitance vs scan rate (b) of ACFTs/MoS<sub>2</sub> electrode synthesized for different time

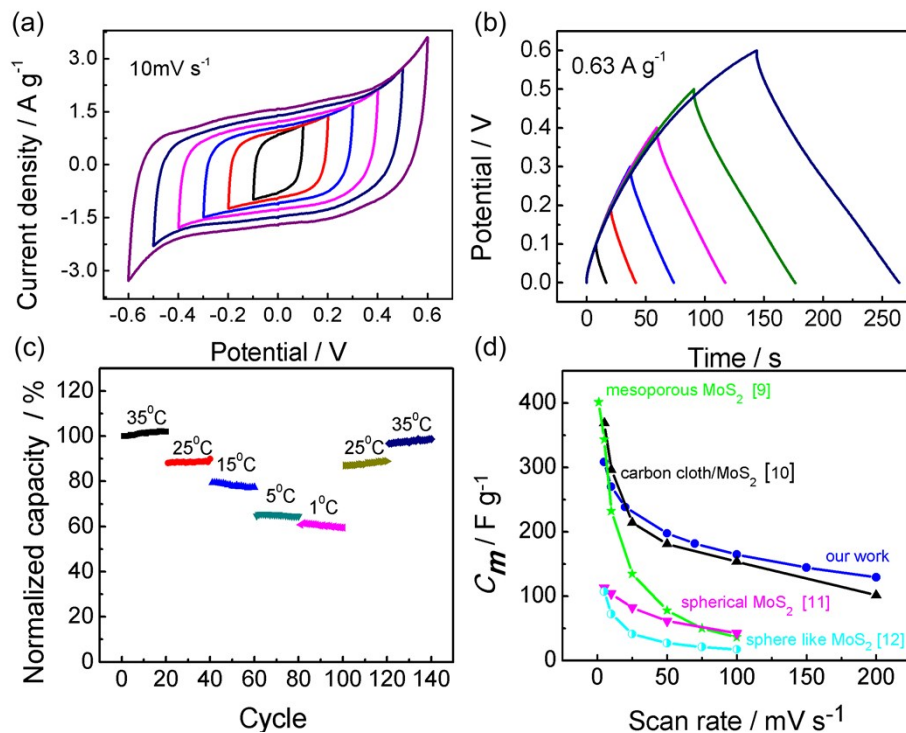

**Figure S5** Electrochemical performances of ACFTs/MoS<sub>2</sub> planar pattern SC. (a) CV curves under different voltage windows at 10 mV s<sup>-1</sup>; (b) GCD performances under different voltage ranges at 0.63 A g<sup>-1</sup>; (c) Normalized Capacity under different controlling temperatures (c); (d) Comparison of mass specific capacitance of MoS<sub>2</sub>-based SC in recent papers.<sup>9-12</sup>

## (2) Illustration for temperature influence on capacitance in figures S5c

The influence of measuring temperature on the electrochemical performances of ACFTs/MoS<sub>2</sub> planar pattern SC is shown in Figure S5c. To get the results, the charging-discharging performance of ACFTs/MoS<sub>2</sub> planar pattern SC was measured at constant current density of 2.21 A g<sup>-1</sup>, and the ambient temperature was controlled to decrease from initial 35 °C to 1 °C and then recover to 35 °C, and under each temperature, only the SC was charged-discharged twenty times. All the capacities gained under different temperatures was normalized to the initial capacity under 35 °C, and then the normalized capacity could be got. As the temperature decreases from 35 °C to 1 °C, the capacity decreases gradually to 61.2% of its initial value with good stability at each test temperature and recovers to 98.7% of the initial value as the temperature increased to 35 °C, demonstrating that the ambient temperature has an impact on specific capacitance.

## Calculation of electrochemical capacitance:

The specific capacitance of electrodes, including mass specific capacitance ( $C_m$ ) and volumetric specific capacitance ( $C_v$ ), are calculated according to formulas (1) and (2) reported previously<sup>13</sup>, where  $C$  is the measured capacitance (from CV) in the two-electrode configuration,  $M$  and  $V$  are respectively the mass of MoS<sub>2</sub> nanosheets and volume of the single fiber electrode.

$$C_m = 2C/M \quad (1)$$

$$C_v = 2C/V \quad (2)$$

The mass energy density ( $E_m$ ), volumetric energy density ( $E_v$ ), mass power density ( $P_m$ ) and volumetric power density ( $P_v$ ) can be obtained according to formulas (3-6) from GCD curves, where  $t$  is the discharge time,  $U$  represents the potential window.

$$E_m = C_m \times U^2 \times 8^{-1} \times 3.6^{-1} \quad (3)$$

$$E_v = C_v \times U^2 \times 8^{-1} \times 3.6^{-1} \quad (4)$$

$$P_m = E_m \times 3,600 \times t^{-1} \quad (5)$$

$$P_v = E_v \times 3,600 \times t^{-1} \quad (6)$$

### Supporting References:

1. Y. Zhao, L. Kuai, Y. Liu, P. Wang, H. Arandiyan, S. Cao, J. Zhang, F. Li, Q. Wang, B. Geng and H. Sun, *Scientific Reports*, 2015, **5**, 8722.
2. E. G. da Silveira Firmiano, A. C. Rabelo, C. J. Dalmaschio, A. N. Pinheiro, E. C. Pereira, W. H. Schreiner and E. R. Leite, *Advanced Energy Materials*, 2014, **4**, 175-178.
3. J. Zhou, J. Qin, X. Zhang, C. Shi, E. Liu, J. Li, N. Zhao and C. He, *ACS Nano*, 2015, **9**, 3837-3848.
4. H. Yang, Y. Lu, K. Lin, S. Hsu, C. Huang, S. She, H. Liu, C. Lin, M. Xiao, S. Wey, P. Chen, T. Yen, K. Wei and C. Ma, *Biomaterials*, 2013, **34**, 7204-7214.
5. K. Krishnamoorthy, M. Veerapandian, R. Mohan and S. Kim, *Appl. Phys. A*, 2012, **106**, 501-506.
6. A. Van Deynse, P. Cools, C. Leys, R. Morent and N. De Geyter, *Surface and Coatings Technology*, 2015, **276**, 384-390.
7. Y. Liu, X. Zhang, C. Song, Y. Zhang, Y. Fang, B. Yang and X. Wang, *Materials & Design*, 2015, **88**, 810-819.

8. W. J. Dong, J. Ham, G. H. Jung, J. H. Son and J. L. Lee, *Journal of Materials Chemistry A*, 2016, **4**, 4755-4762.
9. M. S. Javed, S. Dai, M. Wang, D. Guo, L. Chen, X. Wang, C. Hu and Y. Xi, *Journal of Power Sources*, 2015, **285**, 63-69.
10. A. Ramadoss, T. Kim, G.-S. Kim and S. J. Kim, *New Journal of Chemistry*, 2014, **38**, 2379-2385.
11. P. Ilanchezhian, G. M. Kumar and T. W. Kang, *Journal of Alloys & Compounds*, 2015, **634**, 104-108.
12. K. Krishnamoorthy, G. K. Veerasubramani, S. Radhakrishnan and J. K. Sang, *Materials Research Bulletin*, 2013, **50**, 499-502.
13. L. Liu, Y. Yu, C. Yan, K. Li and Z. Zheng, *Nat Commun*, 2015, **6**, 7260.
